# Supplementary material
Source: Springer Nature journal article supplement (https://www.springermedizin.de/resource/supplementary/12885_2011_2868_MOESM5_ESM.pdf/9462080)

(A)

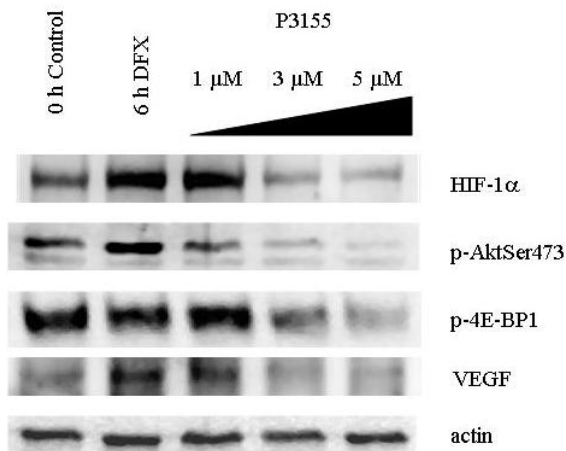

(B)

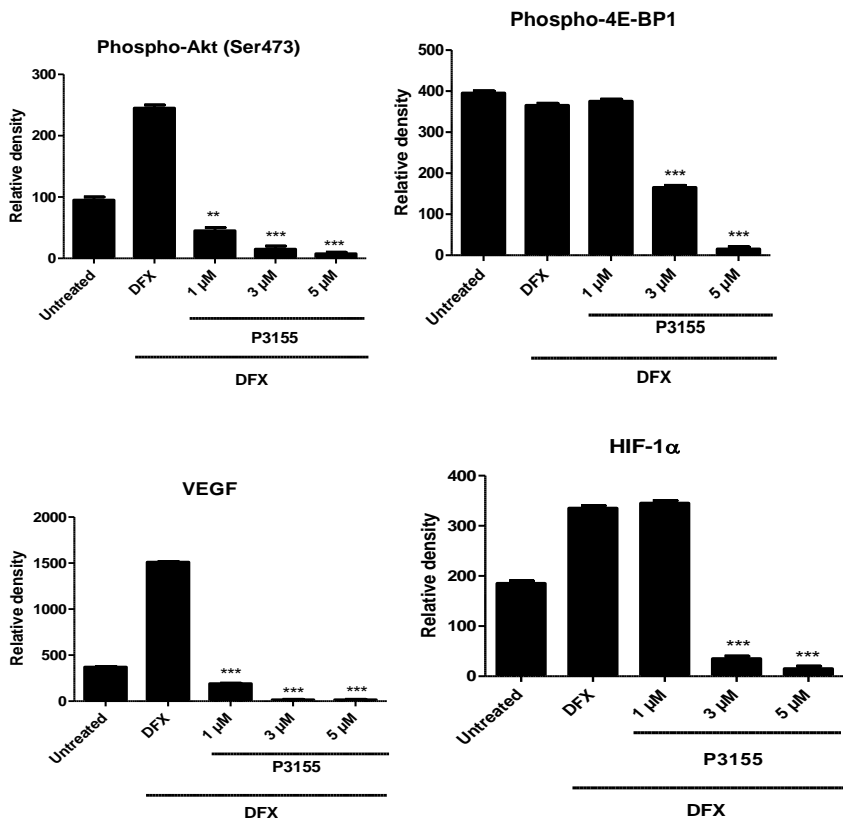

Supplement: MOESM5 [file 9462080]
